# Supplementary material
Source: publisher figshare collection journal article supplement (https://plos.figshare.com/articles/dataset/_/119605)
Supplement: Supplementary file [file 1]

Table. S1. The set of *S. Typhimurium ssaV* double mutants which were screened for attenuation in *cybb/nos2<sup>-/-</sup>* mice.

|    |                   |              |          |              |                                                                            | Abundance of mutants relative to mean inoculum | Specific attenuation of mutants in mice relative to inoculum |       |        |
|----|-------------------|--------------|----------|--------------|----------------------------------------------------------------------------|------------------------------------------------|--------------------------------------------------------------|-------|--------|
| #  | SL1344 Identifier | LT2 ortholog | WITS tag | Gene Name    | Description as per SL1344 genome reference NC_016810.1                     |                                                | Day1 feces                                                   | MLN   | Spleen |
| 1* | SL1344_3093       | STM3119      | WITS21   | SL1344_3093  | Hypothetical protein                                                       | 1.13                                           | 1.09                                                         | 0.001 | 0.001  |
| 2  | SL1344_0466       | STM0473      | WITS19   | <i>hha</i>   | Hemolysin expression modulating protein                                    | 0.36                                           | 0.003                                                        | 0.14  | 0.004  |
| 3  | SL1344_1031       | STM1092      | WITS13   | SL1344_1031  | Hypothetical protein                                                       | 0.69                                           | 0.10                                                         | 0.10  | 0.03   |
| 4  | SL1344_1180       | STM1241      | WITS1    | <i>msgA</i>  | Putative virulence protein MsgA                                            | 0.76                                           | 0.08                                                         | 0.06  | 0.03   |
| 5  | SL1344_1181       | STM1242      | WITS21   | <i>envE</i>  | Putative lipoprotein                                                       | 0.68                                           | 0.10                                                         | 0.10  | 0.05   |
| 6  | SL1344_1026       | STM1087      | WITS2    | <i>pipA</i>  | Hypothetical protein                                                       | 0.64                                           | 0.10                                                         | 0.07  | 0.05   |
| 7  | SL1344_2579       | STM2617      | WITS13   | SL1344_2579  | Putative antitermination protein                                           | 0.91                                           | 0.06                                                         | 0.10  | 0.05   |
| 8  | SL1344_0675       | STM0693      | WITS1    | <i>fur</i>   | Ferric uptake regulation protein                                           | 0.54                                           | 0.03                                                         | 0.22  | 0.06   |
| 9  | SL1344_2525       | STM2563      | WITS19   | <i>yfhG</i>  | Hypothetical protein                                                       | 0.66                                           | 0.07                                                         | 0.08  | 0.09   |
| 10 | SL1344_2363       | STM2395      | WITS1    | <i>pgtE</i>  | Outer membrane protease E                                                  | 0.99                                           | 0.14                                                         | 0.22  | 0.24   |
| 11 | SL1344_2209       | STM2233      | WITS19   | SL1344_2209  | Tail fiber assembly protein                                                | 0.69                                           | 0.66                                                         | 0.55  | 0.25   |
| 12 | SL1344_1033       | STM1094      | WITS11   | <i>pipD</i>  | Putative secreted peptidase                                                | 2.85                                           | 0.22                                                         | 0.23  | 0.28   |
| 13 | SL1344_2841       | STM2861      | WITS13   | <i>sitA</i>  | Iron transport protein, periplasmic-binding protein                        | 1.11                                           | 1.41                                                         | 0.48  | 0.37   |
| 14 | SL1344_1372       | STM1440      | WITS11   | <i>sodC</i>  | Copper/zinc superoxide dismutase                                           | 1.38                                           | 1.16                                                         | 0.59  | 0.54   |
| 15 | SL1344_1467       | STM1538      | WITS13   | <i>hyaB2</i> | Uptake hydrogenase-1 large subunit                                         | 0.89                                           | 1.20                                                         | 1.06  | 0.60   |
| 16 | SL1344_2273       | STM2304      | WITS21   | <i>pmrD</i>  | Polymyxin B resistance protein                                             | 1.40                                           | 1.54                                                         | 0.90  | 0.65   |
| 17 | SL1344_2976       | STM2998      | WITS2    | SL1344_2976  | Hypothetical protein                                                       | 0.92                                           | 1.16                                                         | 1.10  | 0.71   |
| 18 | SL1344_2532       | STM2570      | WITS19   | STM2570      | Putative PTS system IIBC component                                         | 0.98                                           | 0.94                                                         | 0.85  | 0.74   |
| 19 | SL1344_2802       | STM2817      | WITS21   | <i>luxS</i>  | S-ribosylhomocysteinase                                                    | 1.11                                           | 1.48                                                         | 1.02  | 0.75   |
| 20 | SL1344_1983       | STM2008      | WITS11   | SL1344_1983  | Hypothetical protein                                                       | 1.36                                           | 0.95                                                         | 0.88  | 0.80   |
| 21 | SL1344_2208       | STM2232      | WITS13   | SL1344_2208  | Putative lipopolysaccharide modification acyltransferase                   | 1.05                                           | 0.94                                                         | 1.07  | 0.87   |
| 22 | SL1344_1982       | STM2007      | WITS2    | SL1344_1982  | Hypothetical protein                                                       | 1.09                                           | 0.97                                                         | 1.02  | 0.87   |
| 23 | SL1344_2966       | STM2986      | WITS19   | SL1344_2966  | Hypothetical protein                                                       | 1.07                                           | 1.04                                                         | 0.99  | 0.92   |
| 24 | SL1344_1979       | STM2005      | WITS1    | SL1344_1979  | Hypothetical protein                                                       | 1.23                                           | 0.96                                                         | 0.87  | 0.94   |
| 25 | SL1344_1987       | STM2011      | WITS11   | SL1344_1987  | Hypothetical protein                                                       | 1.31                                           | 0.97                                                         | 1.15  | 1.01   |
| 26 | SL1344_1195       | STM1259      | WITS2    | SL1344_1195  | Putative ABC transport ATP-binding subunit                                 | 0.85                                           | 1.43                                                         | 1.54  | 1.06   |
| 27 | SL1344_4253       | STM4317      | WITS11   | SL1344_4253  | Hypothetical protein                                                       | 1.24                                           | 1.43                                                         | 1.12  | 1.06   |
| 28 | SL1344_2386       | STM2423      | WITS1    | <i>yfeN</i>  | Hypothetical protein                                                       | 1.19                                           | 1.39                                                         | 1.39  | 1.22   |
| 29 | SL1344_1879       | STM1950      | WITS19   | <i>sdiA</i>  | Transcriptional regulator of <i>ftsQAZ</i> gene cluster (LuxR/UhpA family) | 1.01                                           | 1.02                                                         | 1.23  | 1.26   |
| 30 | SL1344_2207       | STM2231      | WITS13   | SL1344_2207  | Putative SsrB-regulated factor                                             | 0.75                                           | 0.85                                                         | 1.63  | 1.32   |
| 31 | SL1344_3311       | STM3339      | WITS11   | <i>nanA</i>  | N-acetylneuraminate lyase                                                  | 1.03                                           | 0.68                                                         | 0.82  | 1.32   |
| 32 | SL1344_1688       | STM1760      | WITS21   | SL1344_1688  | Hypothetical protein                                                       | 1.20                                           | 1.15                                                         | 1.19  | 1.58   |
| 33 | SL1344_2578       | STM2616      | WITS1    | SL1344_2578  | Bacteriophage protein                                                      | 1.03                                           | 1.07                                                         | 1.17  | 1.75   |
| 34 | SL1344_1198       | STM1263      | WITS2    | SL1344_1198  | Hypothetical protein                                                       | 1.05                                           | 1.14                                                         | 1.26  | 1.90   |
| 35 | SL1344_1376       | STM1444      | WITS2    | <i>slyA</i>  | Transcriptional regulator <i>slyA</i>                                      | 0.87                                           | 0.24                                                         | 3.59  | 4.69   |

# Strains were ordered according to their degree of attenuation in spleen, day 4 post infection.

\* This mutation is present in the sLAV strain Z234

The isogenic control strain *ssaV::cat* (WITS tag 17; M2735) was always included as internal reference
